# Supplementary material for: Base–acid hybrid water electrolysis
Source: Royal Society of Chemistry journal article supplement (doi:10.1039/c5cc09642a), 2016-01-01
Supplement: c5cc09642a1.pdf [file c5cc09642a1.pdf]

## Supplementary Materials

### Base-Acid Hybrid Water Electrolysis

Long Chen, XiaoLi Dong, Fei Wang, Yonggang Wang\*, Yongyao Xia

\*To whom correspondence should be addressed. E-mail: ygwang@fudan.edu.cn

#### Experimental section

**Materials:** CoO nanowires were synthesized according to previous report. In a typical procedure, 0.29 g of  $\text{Co}(\text{NO}_3)_2 \cdot 6\text{H}_2\text{O}$  and 0.24 g of urea were dissolved in 15 mL of  $\text{H}_2\text{O}$  and 15 mL of ethanol to form a pink solution. The mixed solution was then placed in a 100-mL Teflon lined stainless steel autoclave. The autoclave was sealed and heated at  $90^\circ\text{C}$  for 8 hours and allowed to cool to room temperature. The obtained precipitates were filtered, washed with deionized water for several times, and then annealed at  $250^\circ\text{C}$  for 2h in  $\text{N}_2$  flow. Then, soaking the as-prepared powder in 1 M  $\text{NaBH}_4$  for solution for 1 h, then collected by centrifugation, washed with deionized water and dried in a vacuum oven at  $80^\circ\text{C}$  for 12 h. The ceramic LATSP film ( $2.5 \times 2.5 \text{ cm}^2$ , 150 $\mu\text{m}$  in thickness) was purchased from Ohara Inc., Japan. Commercialized Pt-foil electrodes were used as received.

**Electrochemical Measurements:** OER catalytic electrode was prepared by mixing 80 wt % CoO nanowires, 10 wt % conductive agent (acetylene black) and 10 wt % poly (tetrafluoroethylene) (PTFE) binder in an isopropanol solution to form a homogeneous slurry, which was then rolled into a film. The film was cut into a square area of  $0.4 \text{ cm} \times 0.4 \text{ cm}$  ( $0.16 \text{ cm}^2$ ), and then pressed onto a stainless steel mesh that was employed as current collector to form the OER catalytic electrode. Commercialized platinum-foil

electrode was used as the HER catalytic electrode directly. The onset potential of OER on CoO-nanowire-based electrode in 1 M KOH and the onset potential of HER on Pt-foil electrode in 0.5 M H<sub>2</sub>SO<sub>4</sub> was investigated by linear sweep voltammetric measurements with a typical three-electrode method, in which a Pt plate and saturated calomel electrode (SCE, 0.242 V vs. standard hydrogen electrode) were used as the counter and reference electrodes, respectively. The base-acid hybrid electrolytic cell was fabricated by using CoO-nanowire-based electrode and Pt-foil electrode as OER and HER catalytic electrodes, respectively (see **Fig. 4**). A basic solution (1M KOH + 0.5M Li<sub>2</sub>SO<sub>4</sub>) and an acidic solution (0.5M H<sub>2</sub>SO<sub>4</sub>) were anodic electrolyte and cathodic electrolyte, respectively. The anodic electrolyte and cathodic electrolyte were separated by a ceramic LATSP film. Electrochemical performance of the base-acid hybrid electrolytic cell was probed by two-electrode method [CoO-nanowire-based electrode was used as work electrode; Pt-foil electrode was used as counter/reference electrode]. All of electrochemical measurements were performed with a CHI 660D electrochemistry workstation.

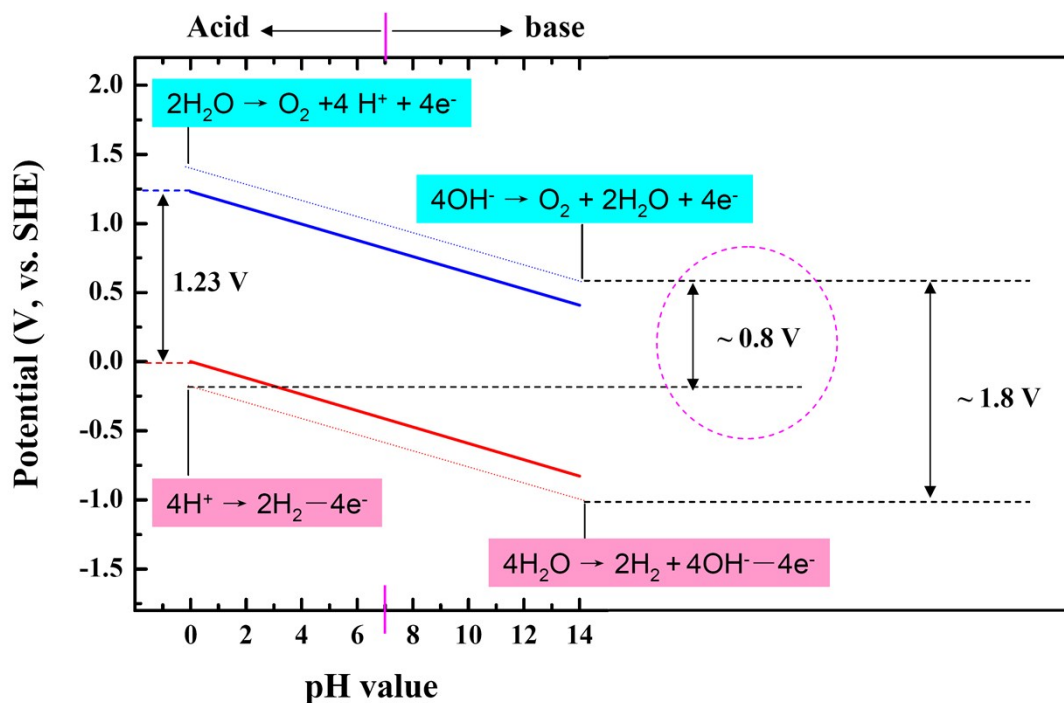

**Figure S1. Potentials of oxygen-evolving reaction (OER) and hydrogen-evolving reaction (HER) in aqueous electrolyte solutions with different pH values.** Red-real-line: theoretical potential for HER; Blue-real-line: theoretical potential for OER; Red-broken-line: potential for HER (theoretical potential + over potential); Blue-broken-line: potential for OER (theoretical potential + over potential).

As shown in **Fig. S1**, water electrolysis requires an applied voltage of at least 1.23 V to provide the thermodynamic driving force. Owing to the practical overpotentials associated with the reaction kinetics, however, a substantially larger voltage (1.8 ~ 2.0 V) is inevitably needed. If we combine the HER in an acid (i. e.  $4\text{H}^+ \rightarrow 2\text{H}_2 - 4\text{e}^-$ ) and the OER in a base (i. e.  $4\text{OH}^- \rightarrow \text{O}_2 + 2\text{H}_2\text{O} + 4\text{e}^-$ ), a low driving voltage (~ 0.8 V) for water electrolysis would be achieved (see **Fig. S1**). It should be key reason for us to develop the base-acid hybrid water electrolysis.

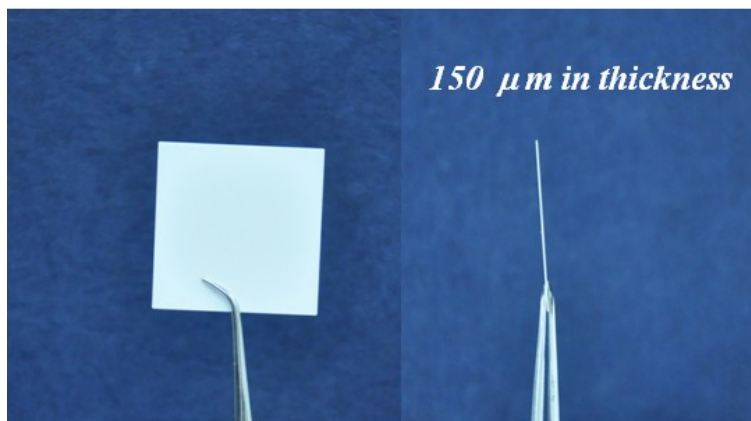

**Figure S2. Photograph of LATSP ceramic film.** The water-stable lithium super-ionic conductor ceramic film (LATSP,  $\text{Li}_{1+x+y}\text{Al}_x\text{Ti}_{2-x}\text{Si}_y\text{P}_{3-y}\text{O}_{12}$ ) with thickness of 0.15 millimeter is the product of Ohara Inc., Japan. Its conductivity is  $10^{-4} \text{ S cm}^{-1}$ . LATSP is a kind of ceramic solid electrolyte for lithium-ion batteries, and has been widely investigated on the study about all solid state lithium-ion batteries<sup>1-3</sup>.

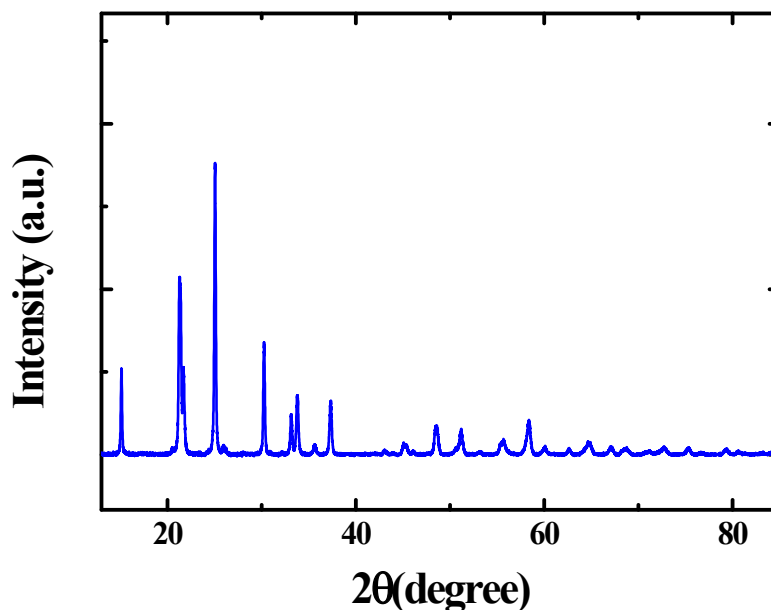

**Figure S3. XRD pattern of LATSP ceramic film.** As shown in **Fig. S3**, LATSP has a typical NASICON structure. The NASICON structure consists of  $\text{PO}_4$ -tetrahedra and  $\text{MO}_6$ -octahedra ( $\text{M}=\text{Ti}$ ) linked by shared oxygen atoms<sup>4-7</sup>. There are two types of position of Li-ion localization that can be distinguished: M1 positions, surrounded by six oxygen atoms; and M2 positions, surrounded by eight oxygen atoms. Hence, a system of three dimensional channels arises, where Li-ion transport realized by alternating of positions M1 and M2<sup>4,5</sup>. Accordingly, the ceramic LATSP film can permit the pass of Li-ion with high diffusion rate.

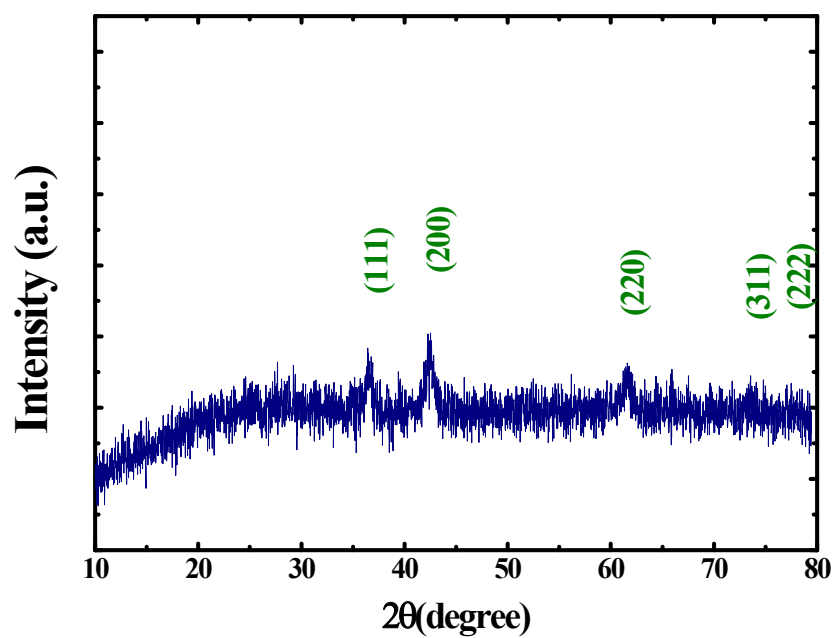

**Figure S4. X-ray diffraction (XRD) pattern of CoO nanowires.** The diffraction peaks in the spectrum corresponding with (111), (200), (220), (311), and (222) crystal facets from cubic CoO suggest that it has a good crystalline structure.

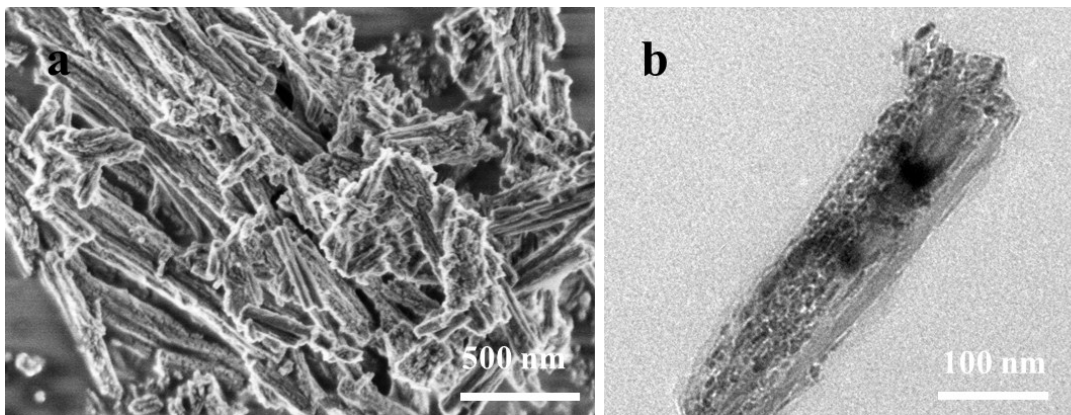

**Figure S5. SEM image (a) and TEM image (b) of CoO nanowires.** SEM image shows that the CoO nanowires have a uniform size with diameter of about 100 nm. TEM image suggests that each nanowire is composed of a lot of small nanoparticles with multiple mesopores.

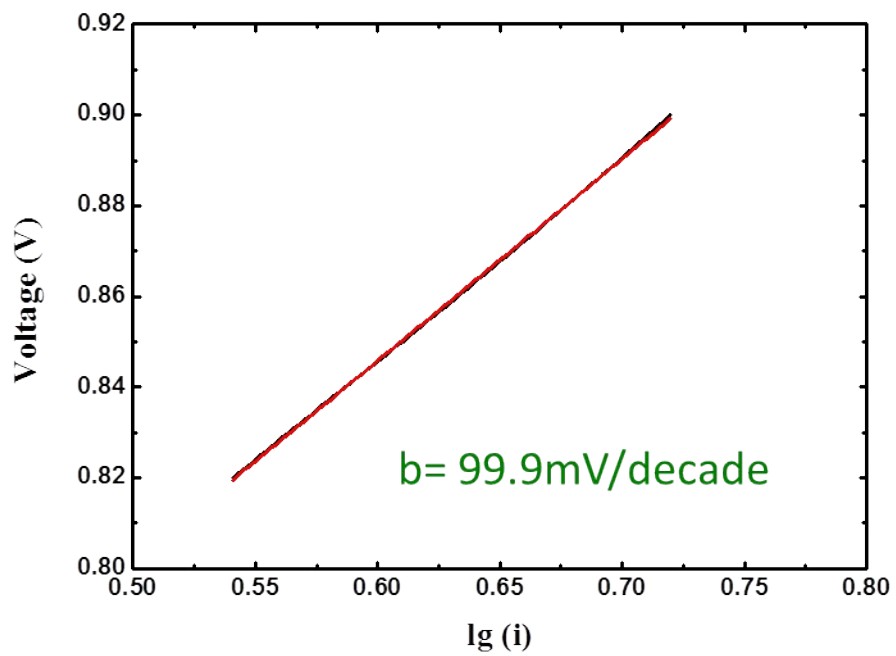

**Figure S6. Tafel plots of the base-acid hybrid electrolytic cell.** As shown in Figure S6, this hybrid electrolytic system yields a Tafel slope of 99.9 mV/decade, indicating that the reaction rate is low.



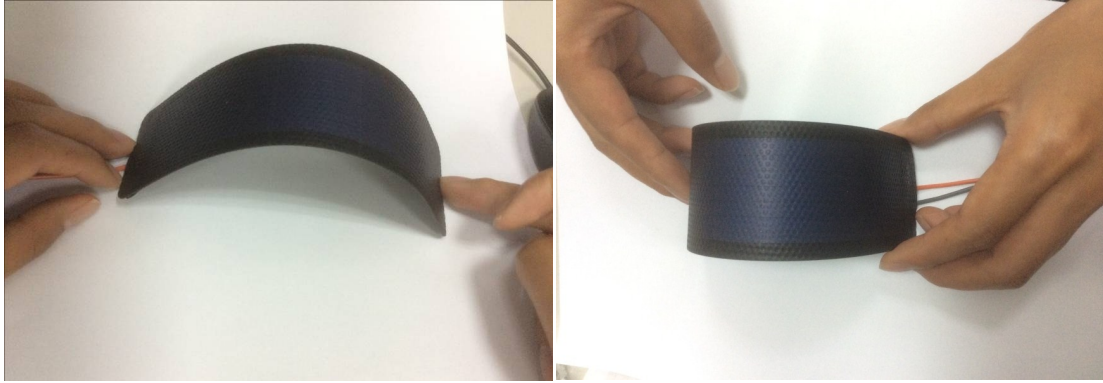

**Figure S7. Photograph of the flexible solar cell purchased from Wuxi warmspace Tec. co, Ltd.**

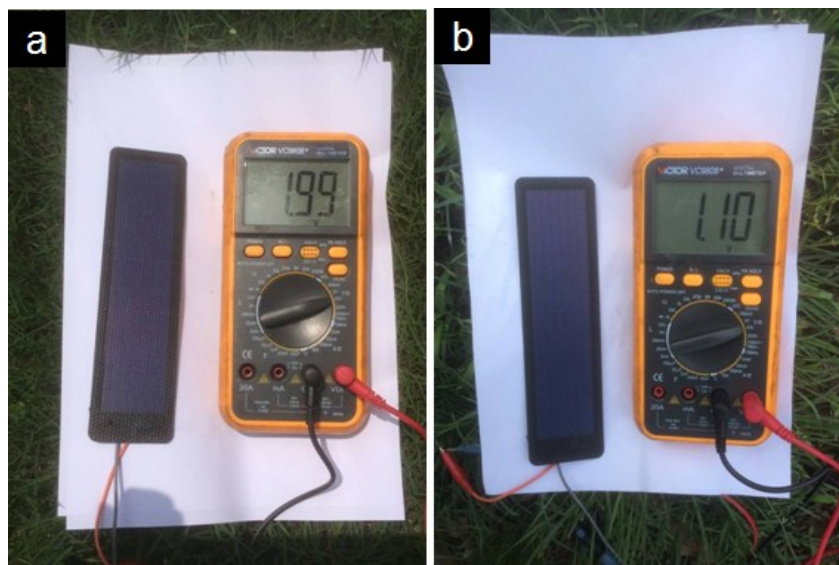

**Figure S8. Output voltage of solar cell at different conditions. (a)** Noontime with abundant sunshine radiation. **(b)** Afternoon with deficient sunshine radiation.

## References

1. Fergus, J. W. Ceramic and polymeric solid electrolytes for lithium-ion batteries. *J. Power Sources* **195**, 4554-4569 (2010).
2. Xie, J. et al. Li-ion transport in all-solid-state lithium batteries with LiCoO<sub>2</sub> using NASICON-type glass ceramic electrolytes. *J. Power Sources* **189**, 365–370 (2009).
3. Yada, C., Iriyama, Y., Abe, T., Kikuchi, K. & Ogumi, Z. A novel all-solid-state thin-film-type lithium-ion battery within situ prepared positive and negative electrode materials. *Electrochem. Commun.* **11**, 413–416 (2009).
4. Pinus, I.Y., Khoroshilov, A. V., Gavrichev, K. S., Tarasov, V. P. & Yaroslavtsev, A. B. On cationic mobility in Nasicon phosphates LiTi<sub>2</sub>(PO<sub>4</sub>)<sub>3</sub> and Li<sub>0.9</sub>Ti<sub>1.9</sub>Nb<sub>0.1</sub>(PO<sub>4</sub>)<sub>3</sub>. *Solid State Ionics*, **212**, 112-116 (2012).
5. Cretin, M., Khireddine, H. & Fabry, P. NASICON structure for alkaline ion recognition. *Sensors and Actuators B* **43**, 224-229 (1997).
6. Aatiq, A., Ménétrier, M., Croguennec, L., Suard, E. & Delmas, C. On the structure of Li<sub>3</sub>Ti<sub>2</sub>(PO<sub>4</sub>)<sub>3</sub>. *J. Mater. Chem.* **12**, 2971-2978 (2012).
7. Arbi, K., Kuhn, A., Sanz, J. & Garacia-Alvarado, F. Characterization of lithium insertion into NASICON-type Li<sub>1+x</sub>Ti<sub>2-x</sub>Al<sub>x</sub>(PO<sub>4</sub>)<sub>3</sub> and its electrochemical behavior. *J. Electrochem. Soc.* **157**, A654-A659 (2010).
